# Supplementary material
Source: PubMed Central journal article supplement (PMC6784528)
Supplement: baADV2019000458-suppl1.pdf [file baADV2019000458-suppl1.pdf]

# Supplementary table 1. Summary of baseline patient characteristics and initial treatment received for 365 patients with early stage FL.

|                           |                    | All Patients |      | Stage I    |      | Stage II   |      | P value |
|---------------------------|--------------------|--------------|------|------------|------|------------|------|---------|
|                           |                    | n = 365      | 100% | n=221      | 61%  | n=144      | 39%  |         |
| Age                       | Median (Range)     | 63 (21-94)   |      | 61 (21-94) |      | 62 (28-85) |      | 0.55    |
| Sex                       | Male               | 209/365      | 57.2 | 120/221    | 54.3 | 89/144     | 61.8 | 0.178   |
| ECOG PS                   | ≥2                 | 18/365       | 4.9  | 13/221     | 5.9  | 5/144      | 3.5  | 0.428   |
| B Symptoms                | Present            | 24/361       | 6.6  | 16/217     | 7.4  | 8/144      | 5.6  | 0.643   |
| LoNoDiam                  | ≥7cm               | 36/271       | 13.3 | 9/161      | 5.6  | 27/110     | 24.5 | <0.001  |
| Nodal Sites               | 0                  | 40/360       | 11.1 | 40/218     | 18.3 | 0/142      | 0.0  | <0.001  |
|                           | 1                  | 190/360      | 52.8 | 178/218    | 81.7 | 12/142     | 8.4  |         |
|                           | 2                  | 111/360      | 30.8 | 0/218      | 0.0  | 111/142    | 78.2 |         |
|                           | 3                  | 15/360       | 4.2  | 0/218      | 0.0  | 15/142     | 10.6 |         |
|                           | 4                  | 4/360        | 1.1  | 0/218      | 0.0  | 4/142      | 2.8  |         |
| Extranodal Sites          | Present            | 63/362       | 17.4 | 40/220     | 18.2 | 23/142     | 16.2 | 0.776   |
| Grade                     | 3A                 | 56/351       | 15.9 | 38/212     | 17.9 | 18/139     | 12.9 | 0.273   |
| B2M                       | > ULN              | 40/182       | 22.0 | 22/111     | 19.8 | 18/71      | 25.3 | 0.463   |
| FLIPI Score               | 0                  | 111/342      | 32.5 | 80/210     | 38.1 | 31/132     | 23.5 | 0.001   |
|                           | 1                  | 177/342      | 51.8 | 107/210    | 51.0 | 70/132     | 53.0 |         |
|                           | 2                  | 50/342       | 14.6 | 23/210     | 10.9 | 27/132     | 20.5 |         |
|                           | 3                  | 4/342        | 1.2  | 0/210      | 0.0  | 4/132      | 3.0  |         |
| Watch and Wait            | Observation        | 85/365       | 23.3 | 49/221     | 22.2 | 36/144     | 25.0 | 0.532   |
| Active Treatment          | RT Alone           | 171/365      | 46.8 | 125/172    | 72.7 | 46/144     | 31.9 | <0.001  |
|                           | Immunochemotherapy | 63/365       | 17.2 | 21/172     | 12.2 | 42/144     | 29.1 | <0.001  |
|                           | CMT                | 46/365       | 12.6 | 26/172     | 15.1 | 20/144     | 13.9 | 0.412   |
| Maintenance Therapy       |                    | 49/280       | 17.5 | 16/172     | 9.3  | 33/108     | 30.6 | <0.001  |
| Median Follow-up (months) |                    | 45           |      | 48         |      | 43         |      | 0.505   |

LoNoDiam = Largest nodal diameter; B2M = beta 2 microglobulin; ECOG PS = performance status; ULN = upper limit normal; XRT = radiotherapy; CMT = combined modality therapy

## Supplementary table 2. Summary of baseline characteristics among treatment arms for actively treated patients with early stage FL.

|                   |                | RT Alone         |      | Systemic Therapy (n = 109) |      |                                 |      | RT vs ICT vs CMT<br>P value | RT vs ICT+CMT<br>p value | ICT vs CMT<br>p value |
|-------------------|----------------|------------------|------|----------------------------|------|---------------------------------|------|-----------------------------|--------------------------|-----------------------|
|                   |                | n=171            | %    | Immunochemotherapy (ICT)   |      | Combined modality therapy (CMT) |      |                             |                          |                       |
|                   |                | n=63             | %    | n=46                       | %    |                                 |      |                             |                          |                       |
| Age               | Median (Range) | 63 (28 – 85)     |      | 63 (21-88)                 |      | 54 (28-82)                      |      | 0.368                       | 0.014                    | 0.245                 |
| Sex               | Male           | 95/170           | 55.9 | 36/63                      | 57.1 | 28/46                           | 60.9 | 0.847                       | 0.732                    | 0.844                 |
| ECOG              | >2             | 8/171            | 4.7  | 5/63                       | 7.9  | 1/46                            | 2.2  | 0.376                       | 0.978                    | 0.398                 |
| B Symptoms        | Present        | 7/167            | 4.2  | 12/63                      | 19.0 | 1/46                            | 2.2  | <0.001                      | 0.0289                   | 0.007                 |
| LoNoDiam          | >7cm           | 9/132            | 6.8  | 13/53                      | 24.5 | 8/30                            | 26.6 | 0.001                       | <0.001                   | 0.589                 |
| No nodal sites    | >2             | 4/170            | 2.4  | 9/62                       | 14.5 | 2/44                            | 4.5  | 0.002                       | <0.001                   | 0.115                 |
| Extranodal        | Extranodal     | 29/171           | 16.9 | 9/62                       | 14.5 | 6/45                            | 13.3 | 0.797                       | 0.613                    | 0.999                 |
| Stage             | I              | 125/171          | 73.1 | 21/63                      | 33.3 | 26/46                           | 56.5 | <0.001                      | <0.001                   | 0.320                 |
| Grade             | 3A             | 26/165           | 15.7 | 11/58                      | 18.9 | 8/46                            | 17.4 | 0.846                       | 0.617                    | 0.999                 |
| B2M               | > ULN          | 19/68            | 27.9 | 9/33                       | 27.2 | 5/35                            | 14.3 | 0.682                       | 0.562                    | 0.745                 |
| FLIPI Score       | 0              | 55/161           | 34.2 | 15/60                      | 25.0 | 23/44                           | 52.2 | 0.029                       | 0.159                    | 0.014                 |
|                   | 1              | 82/161           | 50.9 | 31/60                      | 51.6 | 16/44                           | 36.3 |                             |                          |                       |
|                   | 2              | 24/161           | 14.9 | 12/60                      | 20.0 | 4/44                            | 9.0  |                             |                          |                       |
|                   | 3              | 0/161            | 0    | 2/60                       | 3.0  | 1/44                            | 2.2  |                             |                          |                       |
| ORR               |                | 164/171          | 95.9 | 61/63                      | 96.8 | 44/46                           | 95.6 | 0.872                       | 0.763                    | 0.99                  |
| CR                |                | 122/171          | 71.3 | 47/63                      | 74.6 | 35/46                           | 76.0 | 0.494                       | 0.476                    | 0.860                 |
| Transformation    |                | 11/171           | 6.4  | 1/63                       | 1.6  | 1/46                            | 2.1  | 0.161                       | 0.087                    | 0.999                 |
| 5 Yr PFS (95% CI) |                | 67.9 (57.5-76.2) |      | 86.1 (72.2-93.4)           |      | 71.6 (54.0-83.5)                |      | 0.055                       | 0.011                    | 0.230                 |
| 5 Yr OS (95% CI)  |                | 93.1 (83.3-97.1) |      | 90.8 (74.0-96.9)           |      | 95.0 (80.3-98.7)                |      | 0.707                       | 0.186                    | 0.625                 |

LoNoDiam = Largest nodal diameter; B2M = beta 2 microglobulin; ECOG PS = performance status; ULN = upper limit normal; ORR = overall response rate; CR = complete response.

Supplementary table 3. Summary of radiotherapy dose (A) and immunochemotherapy and maintenance rituximab (B) received for first line treatment in early stage FL.

**A**

|            | All Radiation |      | RT Alone |      | CMT    |      | p value |
|------------|---------------|------|----------|------|--------|------|---------|
|            | n = 187       | %    | n = 149  | %    | n = 38 | %    |         |
| <24 Gy     | 5/187         | 2.7  | 4/149    | 2.6  | 1/38   | 2.6  | 0.127   |
| 24-30 Gy   | 134/187       | 71.7 | 112/149  | 75.2 | 22/38  | 57.9 |         |
| 30.1-36 Gy | 42/187        | 22.4 | 28/149   | 18.8 | 14/38  | 36.9 |         |
| >36 Gy     | 6/187         | 3.2  | 5/149    | 3.4  | 1/38   | 2.6  |         |

**B**

|                       | All Systemic |      | Immunochemotherapy |      | CMT   |      | p value |
|-----------------------|--------------|------|--------------------|------|-------|------|---------|
|                       | n            | %    | n                  | %    | n     | %    |         |
| R-CHOP                | 51/109       | 46.7 | 33/63              | 52.4 | 18/46 | 39.1 | 0.189   |
| R-CVP                 | 29/109       | 26.6 | 9/63               | 14.3 | 20/46 | 43.5 | 0.0009  |
| BR                    | 11/109       | 10.1 | 7/63               | 11.1 | 4/46  | 8.7  | 0.7573  |
| Rituximab Monotherapy | 12/109       | 11.1 | 8/63               | 12.7 | 4/46  | 8.7  | 0.7776  |
| Other                 | 6/109        | 5.5  | 6/63               | 9.5  | 0/46  | 0.0  | 0.0382  |
| Rituximab Maintenance | 49/109       | 45   | 37/63              | 58.7 | 12/46 | 26.1 | 0.0001  |

# Supplementary table 4. Summary of baseline characteristics among treatment approaches for actively treated patients with early stage FL.

|                |            | Radiation |      | Systemic therapy* |      | Systemic + maintenance rituximab |      | P value |
|----------------|------------|-----------|------|-------------------|------|----------------------------------|------|---------|
|                |            | n=171     | %    | n=60              | %    | n=49                             | %    | All     |
| Age            | >60 yrs    | 101/170   | 59.4 | 27/60             | 45.0 | 29/48                            | 60.4 | 0.128   |
| Sex            | Male       | 96/170    | 56.4 | 33/60             | 55.0 | 31/49                            | 63.3 | 0.627   |
| ECOG           | >2         | 8/171     | 4.7  | 3/60              | 5.0  | 3/49                             | 6.1  | 0.92    |
| B Symptoms     | Present    | 7/167     | 4.2  | 4/60              | 6.7  | 9/49                             | 18.4 | 0.003   |
| LoNoDiam       | >7cm       | 9/132     | 6.8  | 6/41              | 14.6 | 15/42                            | 35.7 | <0.001  |
| No nodal sites | >2         | 4/170     | 2.4  | 4/60              | 6.7  | 7/47                             | 14.9 | 0.003   |
| Extranodal     | Extranodal | 29/171    | 17.0 | 7/60              | 11.7 | 8/47                             | 17.0 | 0.608   |
| Stage          | II         | 46/171    | 26.9 | 29/60             | 48.3 | 33/49                            | 67.3 | <0.001  |
| Grade          | 3A         | 26/165    | 15.8 | 13/59             | 22.0 | 6/45                             | 13.3 | 0.433   |
| B2M            | > ULN      | 19/68     | 27.9 | 7/41              | 17.1 | 7/28                             | 25.0 | 0.434   |
| Hb, g/dL       | <12        | 11/169    | 6.5  | 4/59              | 6.8  | 9/49                             | 18.4 | 0.029   |
| LDH            | >ULN       | 24/162    | 14.8 | 8/58              | 13.8 | 13/49                            | 26.5 | 0.125   |
| FLIPI          | Low Risk   | 24/161    | 14.9 | 7/58              | 12.1 | 12/46                            | 26.1 | 0.12    |

\*Systemic therapy includes immunochemotherapy and CMT.

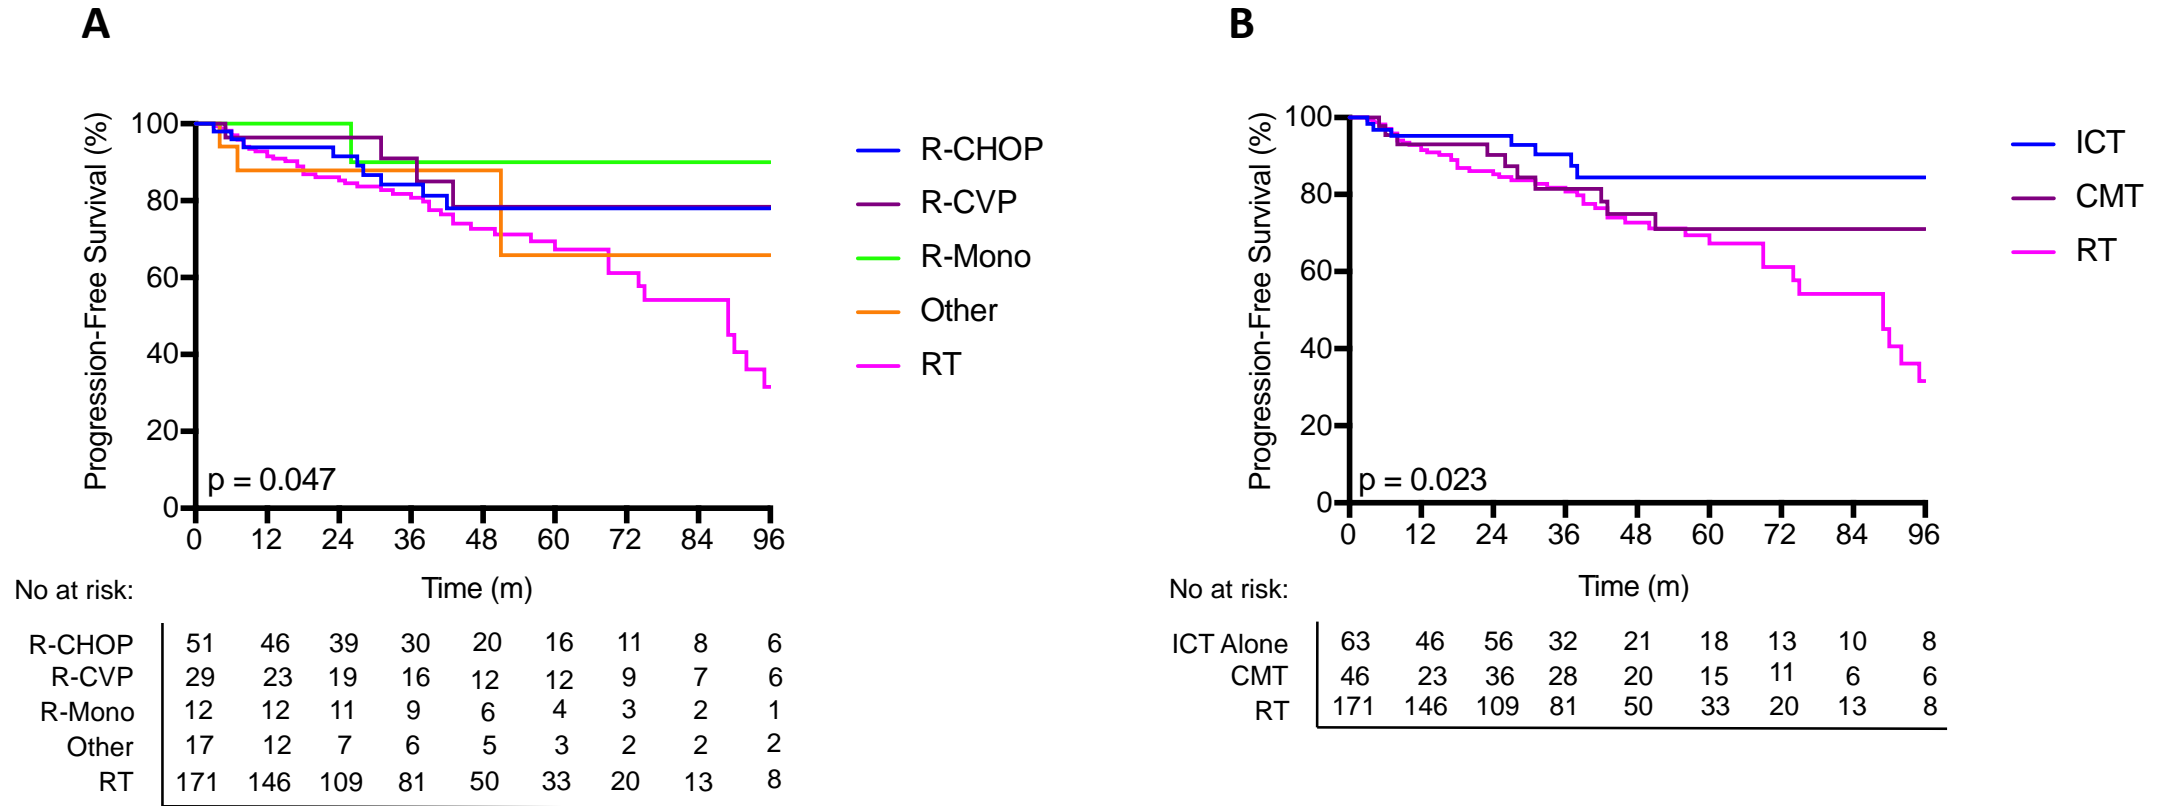

Supplementary Figure 1. A) Progression-free survival among patients treated with different chemotherapy regimens or radiotherapy (RT). Comparing chemotherapy regimens only demonstrated no significant difference in PFS ( $P=0.722$ ). Other:  $n=11$  Bendamustine-rituximab,  $n=4$  chlorambucil-rituximab,  $n=2$  cyclophosphamide, prednisone, rituximab. B) Progression-free survival among patients treated with RT, combined modality therapy (CMT) and immunochemotherapy (ICT). Comparing ICT vs CMT vs RT demonstrated a significant difference in PFS ( $P=0.023$ ). Comparing CMT vs ICT demonstrated no significant difference in PFS ( $P=0.24$ ).

**A**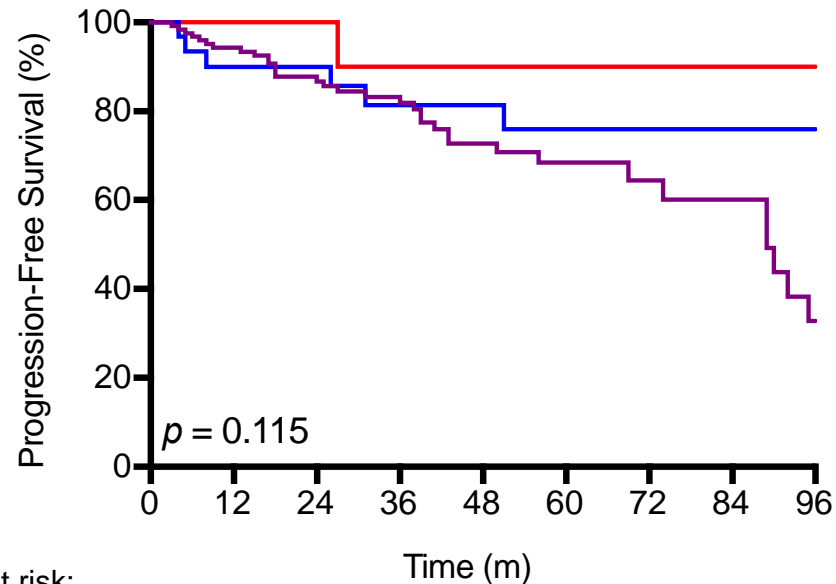

No at risk:

|             |     |     |    |    |    |    |    |    |   |
|-------------|-----|-----|----|----|----|----|----|----|---|
| RT          | 124 | 112 | 81 | 62 | 40 | 26 | 17 | 12 | 7 |
| Sys         | 31  | 24  | 22 | 19 | 16 | 14 | 9  | 7  | 6 |
| Sys + Maint | 16  | 16  | 11 | 9  | 6  | 5  | 3  | 3  | 2 |

**B**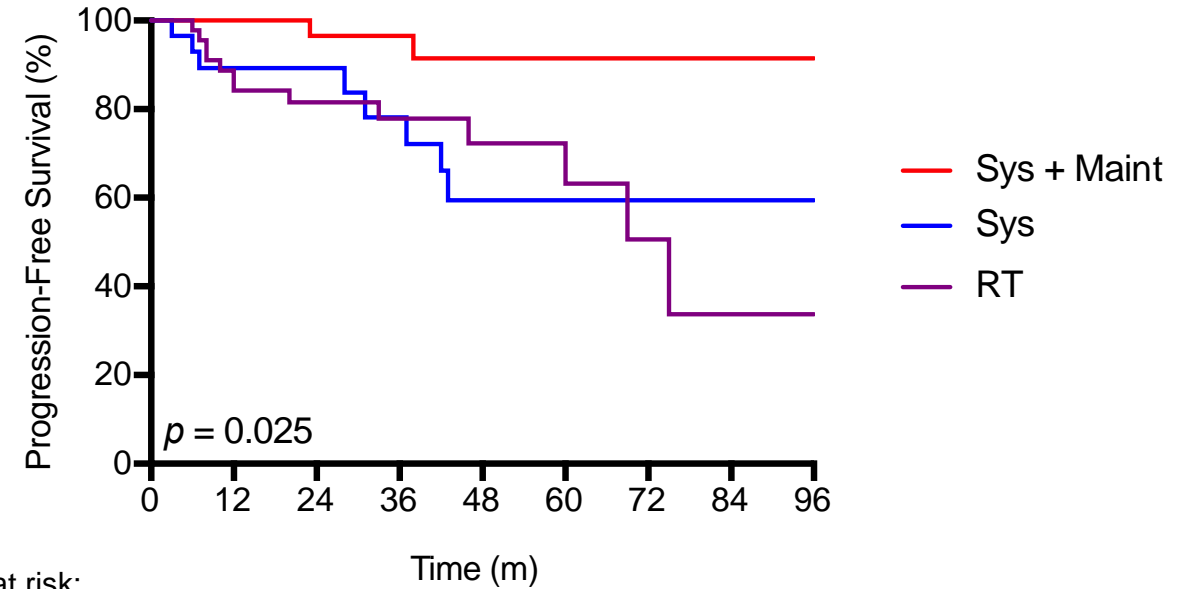

No at risk:

|             |    |    |    |    |    |   |   |   |   |
|-------------|----|----|----|----|----|---|---|---|---|
| RT          | 46 | 39 | 29 | 20 | 21 | 8 | 4 | 2 | 2 |
| Sys         | 29 | 23 | 17 | 14 | 9  | 7 | 5 | 3 | 3 |
| Sys + Maint | 33 | 32 | 27 | 21 | 12 | 9 | 8 | 5 | 5 |

Supplementary Figure 2. Progression-free survival for stage I (A) and stage II (B) patients treated with radiotherapy alone, systemic therapy without maintenance rituximab and systemic therapy with maintenance rituximab.
